# Supplementary material
Source: PubMed Central journal article supplement (PMC7202999)

**ADVANCED  
HEALTHCARE  
MATERIALS**

Supporting Information

for *Adv. Healthcare Mater.*, DOI: 10.1002/adhm.201900977

Controlled Growth Factor Release in 3D-Printed Hydrogels

*Pengrui Wang, David Berry, Amy Moran, Frank He, Trevor Tam, Luwen Chen, and Shaochen Chen\**

**Supplementary Figure 1.** Synthesis and characterization of Hep-SH containing hydrogel. (A) Chemical synthesis process, (B) FT-IR showing thiolation of heparin at  $1600\text{ cm}^{-1}$  absorption and reduction of acrylate group at  $900\text{ cm}^{-1}$  after photopolymerization, (C)  $^1\text{H}$  NMR showing thiol substitution at  $\delta$  2.6 and  $\delta$  2.85 ppm in Hep-SH.

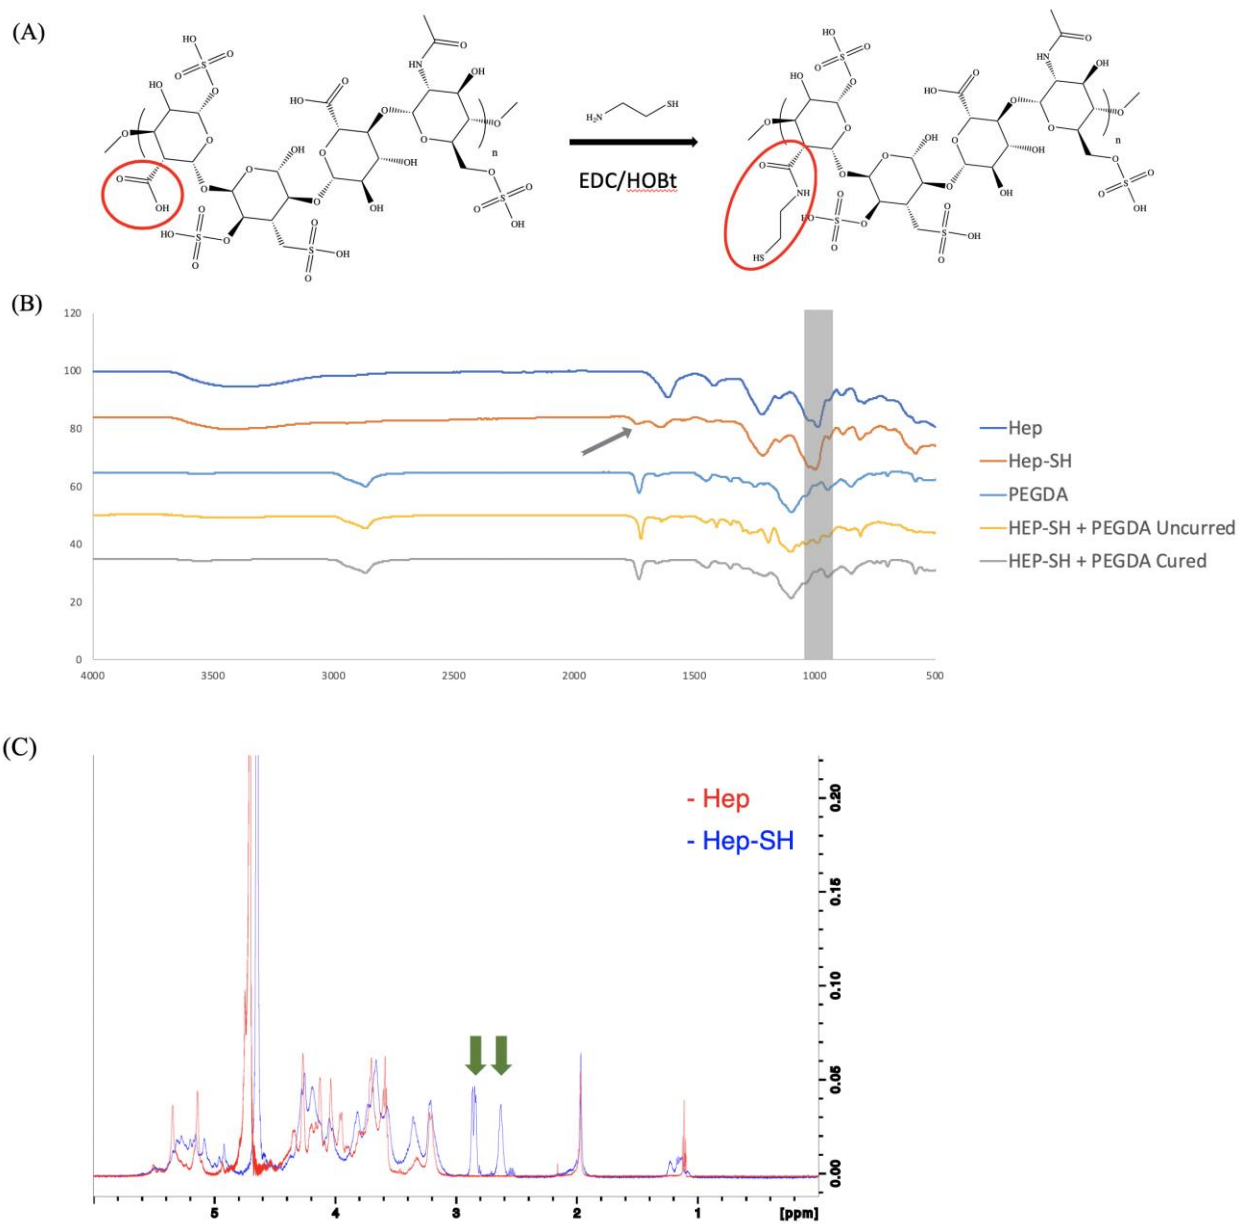

Supplement: NIHMS1063694-supplement-Supple.pdf [file NIHMS1063694-supplement-Supple.pdf]
